# Supplementary material
Source: PubMed Central journal article supplement (PMC1637540)

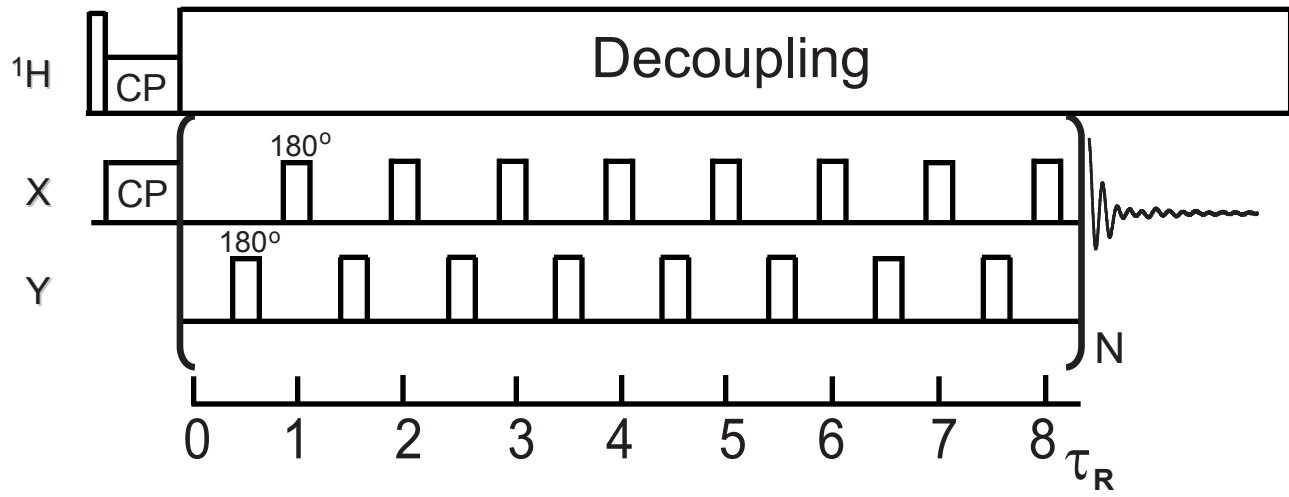

Supplement: pnas_0607193103_1.pdf [file pnas_0607193103_1.pdf]

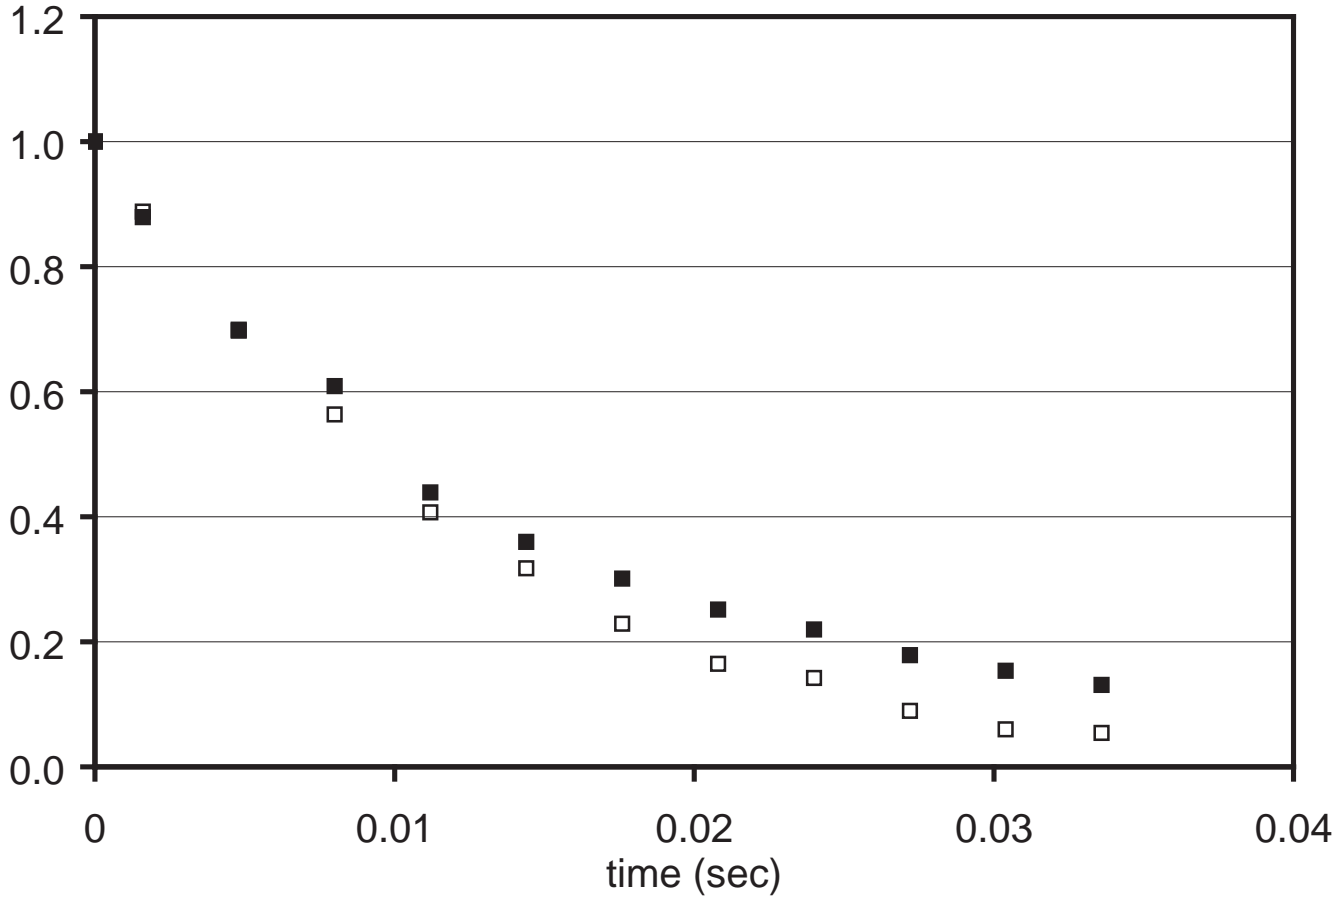

Supplement: pnas_0607193103_2.pdf [file pnas_0607193103_2.pdf]

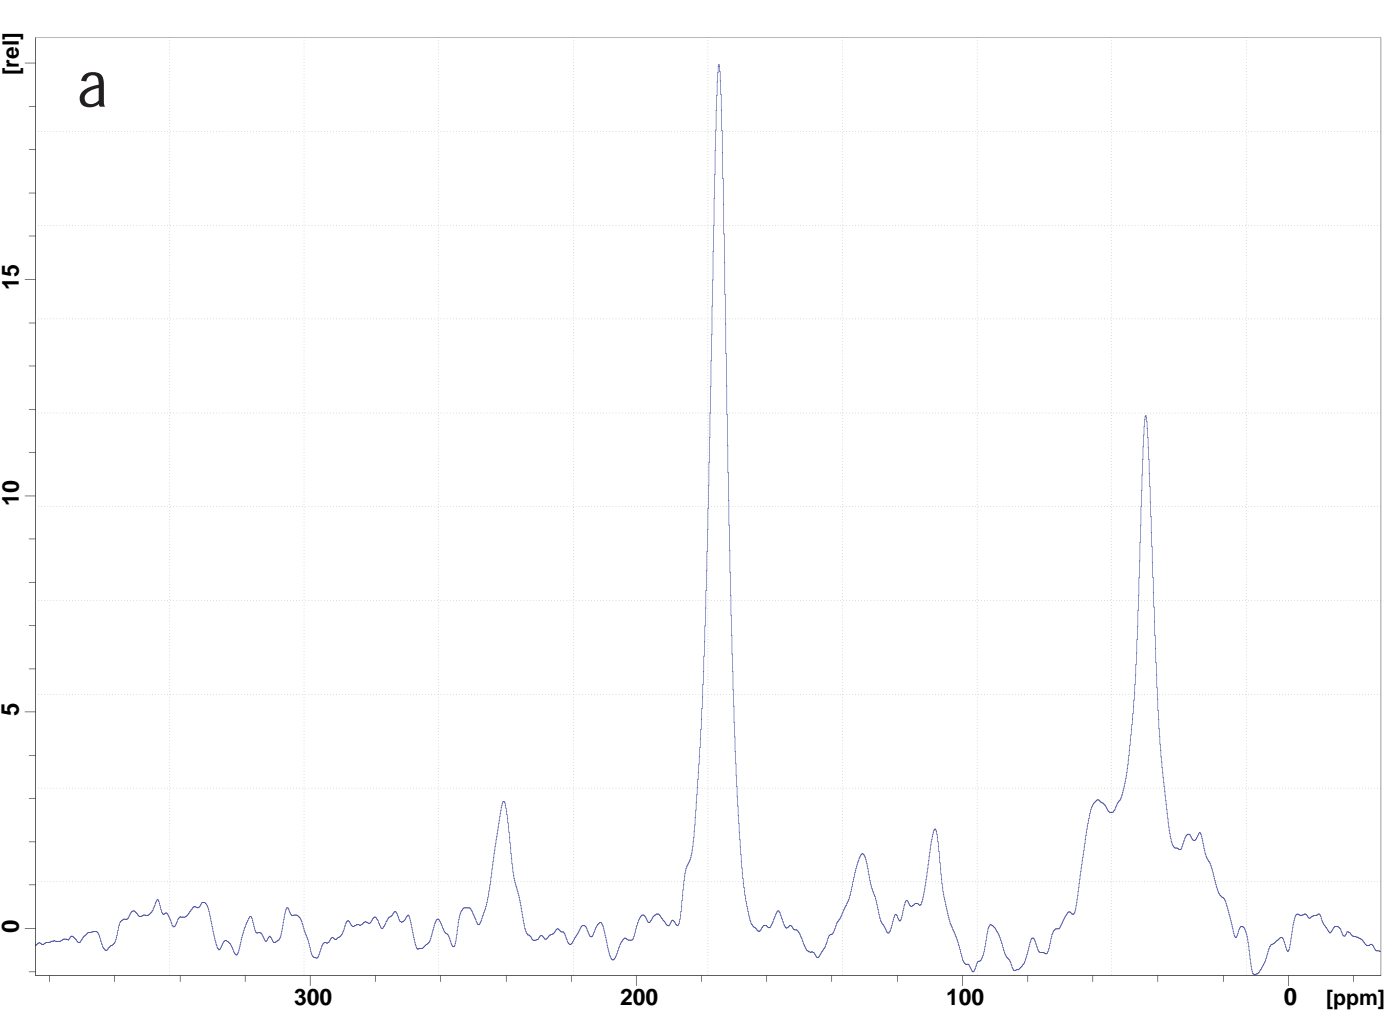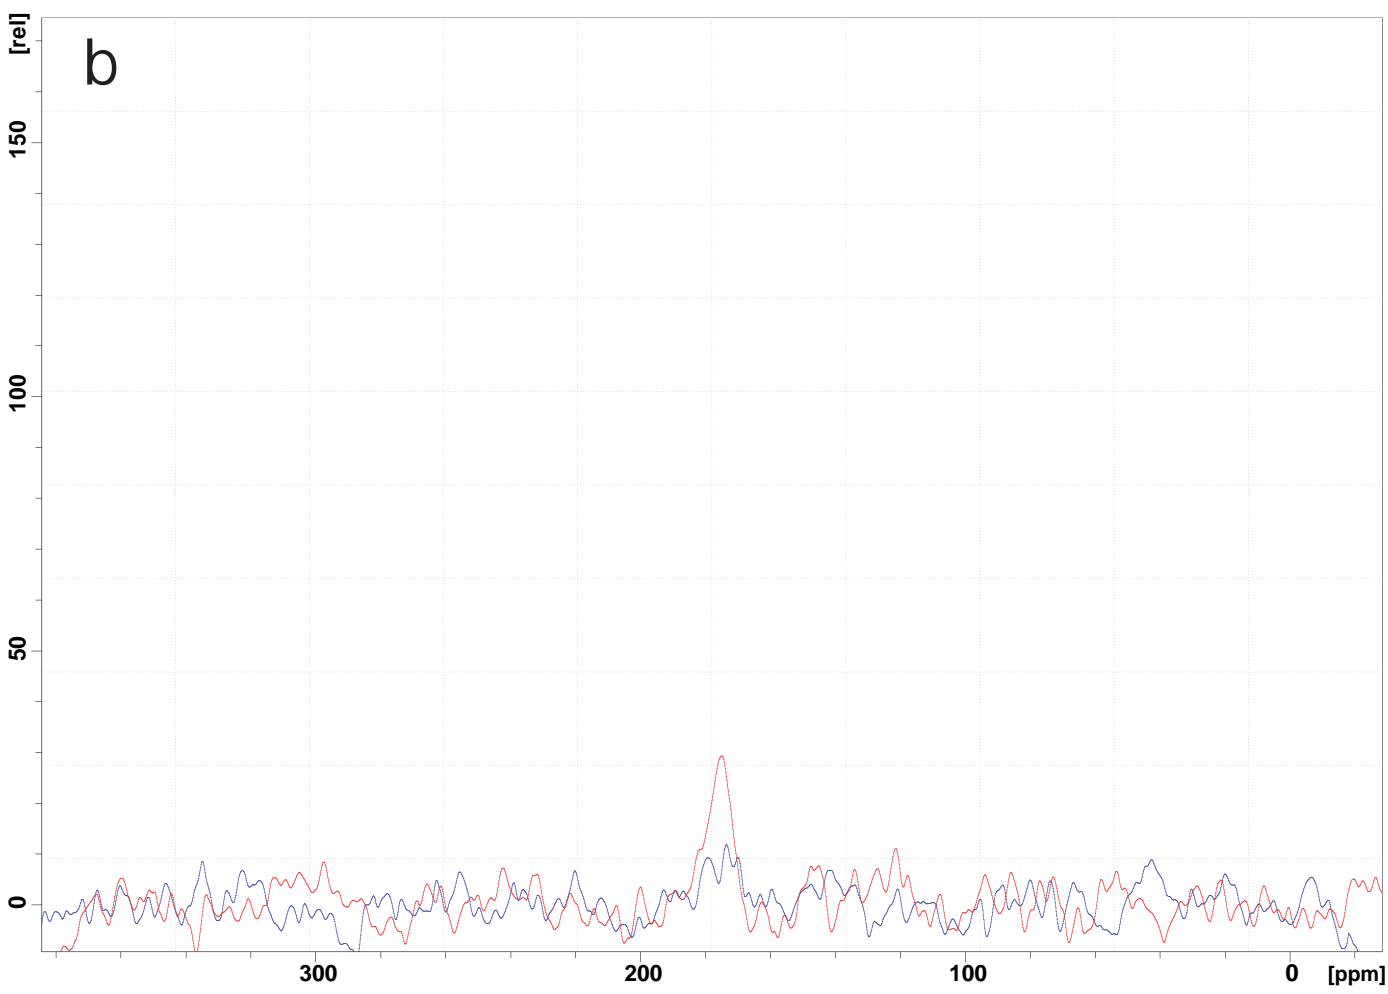

Supplement: pnas_0607193103_3.pdf [file pnas_0607193103_3.pdf]
